# Supplementary material
Source: publisher figshare collection journal article supplement (https://sage.figshare.com/ndownloader/files/12714398)
Supplement: Supplementary file 1 [file 12714398]

## Supplemental Appendix

Table S1– Use, obtain information, interest in receiving information, and interest in asking a physician through ICT types by age.

|                                                                                             | ≤60 years<br>old<br>(n=56) | 61-75 years<br>old<br>(n=171) | >75 years<br>old<br>(n=68) | Chi-<br>square<br>p-value | Total<br>(n=295) |
|---------------------------------------------------------------------------------------------|----------------------------|-------------------------------|----------------------------|---------------------------|------------------|
| Internet Access                                                                             | 40.8%                      | 40.6%                         | 29.7%                      | .285                      | 38.1%            |
| <b>Owning</b>                                                                               |                            |                               |                            |                           |                  |
| Cellphone                                                                                   | 75.5%                      | 85.0%                         | 59.4%                      | .000                      | 77.5%            |
| Smartphone                                                                                  | 32.0%                      | 33.1%                         | 25.6%                      | .647                      | 31.5%            |
| <b>Use of ICT type (at least once a week)</b>                                               |                            |                               |                            |                           |                  |
| SMS                                                                                         | 59.6%                      | 43.0%                         | 46.8%                      | .115                      | 47.1%            |
| Facebook                                                                                    | 35.3%                      | 26.5%                         | 22.0%                      | .325                      | 27.6%            |
| Twitter                                                                                     | 7.0%                       | 4.4%                          | 6.1%                       | .662 <sup>a</sup>         | 5.2%             |
| YouTube                                                                                     | 10.2%                      | 9.7%                          | 7.9%                       | 1.000 <sup>a</sup>        | 9.5%             |
| Email                                                                                       | 25.5%                      | 29.1%                         | 34.1%                      | .655                      | 29.3%            |
| Internet                                                                                    | 33.3%                      | 36.2%                         | 34.1%                      | .919                      | 35.3%            |
| LinkedIn                                                                                    | 2.3%                       | 0.8%                          | 3.0%                       | .302 <sup>a</sup>         | 1.4%             |
| Skype                                                                                       | 2.4%                       | 4.5%                          | 3.0%                       | 1.000 <sup>a</sup>        | 3.8%             |
| <b>Uses ICT to obtain information about disease</b>                                         |                            |                               |                            |                           |                  |
| Internet                                                                                    | 29.4%                      | 26.4%                         | 17.8%                      | .388                      | 25.5%            |
| Facebook                                                                                    | 12.0%                      | 3.4%                          | 7.1%                       | .060 <sup>b</sup>         | 5.8%             |
| Twitter                                                                                     | 0.0%                       | 2.0%                          | 0.0%                       | .752 <sup>b</sup>         | 1.3%             |
| YouTube                                                                                     | 4.0%                       | 2.7%                          | 2.5%                       | .860 <sup>b</sup>         | 3.0%             |
| Email                                                                                       | 6.1%                       | 7.4%                          | 7.1%                       | 1.000 <sup>b</sup>        | 7.1%             |
| <b>Interest in receiving information through electronic media type (high/some interest)</b> |                            |                               |                            |                           |                  |
| SMS                                                                                         | 56.6%                      | 38.7%                         | 51.1%                      | .049                      | 44.7%            |
| Facebook                                                                                    | 30.0%                      | 16.8%                         | 15.4%                      | .099                      | 19.4%            |
| Twitter                                                                                     | 0.0%                       | 3.5%                          | 0.0%                       | .428 <sup>a</sup>         | 2.2%             |
| LinkedIn                                                                                    | 0.0%                       | 0.0%                          | 0.0%                       | N/A                       | 0.0%             |
| Email                                                                                       | 25.5%                      | 30.9%                         | 26.2%                      | .698                      | 28.9%            |
| <b>Interest in asking physician through ICT type (high/some interest)</b>                   |                            |                               |                            |                           |                  |
| SMS                                                                                         | 82.1%                      | 81.9%                         | 98.5%                      | .003                      | 85.8%            |
| Facebook                                                                                    | 39.2%                      | 34.2%                         | 39.1%                      | .725                      | 36.1%            |
| Twitter                                                                                     | 8.2%                       | 10.4%                         | 14.6%                      | .604                      | 10.7%            |
| LinkedIn                                                                                    | 2.0%                       | 2.1%                          | 0.0%                       | 1.000 <sup>a</sup>        | 1.7%             |
| Email                                                                                       | 6.1%                       | 4.3%                          | 0.0%                       | .429 <sup>a</sup>         | 4.0%             |
| <b>Interest in receiving information through WhatsApp (Yes/No)</b>                          |                            |                               |                            |                           |                  |
| Interested                                                                                  | 42.3%                      | 29.6%                         | 22.0%                      | .075                      | 30.7%            |
| <b>Interest in asking physician about disease through WhatsApp (Yes/No)</b>                 |                            |                               |                            |                           |                  |
| Interested                                                                                  | 42.0%                      | 36.4%                         | 31.0%                      | .546                      | 36.6%            |

Notes: All data are presented as percentages. Differences in values between the 3 age groups are significant at .05 significance level. N/A, not applicable.

<sup>a</sup>. Fisher exact test performed.

Table S2 – Use, obtain information, interest in receiving information, and interest in asking a physician through ICT types by gender.

|                                                                                             | Male<br>(n=192) | Female<br>(n=102) | Chi-square<br>p-value | Total<br>(n=295) |
|---------------------------------------------------------------------------------------------|-----------------|-------------------|-----------------------|------------------|
| Internet Access                                                                             | 35.3%           | 44.4%             | .142                  | 38.3%            |
| <b>Owning</b>                                                                               |                 |                   |                       |                  |
| Cellphone                                                                                   | 77.5%           | 78.3%             | .892                  | 77.8%            |
| Smartphone                                                                                  | 32.4%           | 30.2%             | .727                  | 31.6%            |
| <b>Use of ICT type (at least once a week)</b>                                               |                 |                   |                       |                  |
| SMS                                                                                         | 49.1%           | 44.2%             | .452                  | 47.3%            |
| Facebook                                                                                    | 21.0%           | 37.9%             | .004                  | 27.7%            |
| Twitter                                                                                     | 4.8%            | 5.9%              | .759 <sup>a</sup>     | 5.2%             |
| YouTube                                                                                     | 10.9%           | 7.5%              | .396                  | 9.5%             |
| Email                                                                                       | 29.3%           | 29.5%             | .981                  | 29.4%            |
| Internet                                                                                    | 35.2%           | 35.8%             | .922                  | 35.4%            |
| LinkedIn                                                                                    | 1.6%            | 1.2%              | 1.000 <sup>a</sup>    | 1.4%             |
| Skype                                                                                       | 3.2%            | 4.8%              | .716 <sup>a</sup>     | 3.8%             |
| <b>Uses ICT to obtain information about disease</b>                                         |                 |                   |                       |                  |
| Internet                                                                                    | 24.1%           | 28.1%             | .471                  | 25.6%            |
| Facebook                                                                                    | 6.1%            | 5.4%              | .835                  | 5.8%             |
| Twitter                                                                                     | 1.4%            | 1.1%              | 1.000 <sup>a</sup>    | 1.3%             |
| YouTube                                                                                     | 1.4%            | 5.4%              | .114 <sup>a</sup>     | 3.0%             |
| Email                                                                                       | 8.2%            | 5.4%              | .425                  | 7.1%             |
| <b>Interest in receiving information through electronic media type (high/some interest)</b> |                 |                   |                       |                  |
| SMS                                                                                         | 42.4%           | 48.9%             | .313                  | 44.8%            |
| Facebook                                                                                    | 16.5%           | 23.9%             | .166                  | 19.5%            |
| Twitter                                                                                     | 3.7%            | 0.0%              | .082 <sup>a</sup>     | 2.2%             |
| LinkedIn                                                                                    | 0.0%            | 0.0%              | N/A                   | 0.0%             |
| Email                                                                                       | 32.7%           | 23.4%             | .123                  | 29.0%            |
| <b>Interest in asking physician through ICT type (high/some interest)</b>                   |                 |                   |                       |                  |
| SMS                                                                                         | 88.0%           | 81.4%             | .121                  | 85.7%            |
| Facebook                                                                                    | 36.9%           | 35.1%             | .770                  | 36.3%            |
| Twitter                                                                                     | 11.4%           | 9.7%              | .672                  | 10.7%            |
| LinkedIn                                                                                    | 2.2%            | 1.1%              | .647 <sup>a</sup>     | 1.8%             |
| Email                                                                                       | 3.0%            | 5.5%              | .491 <sup>a</sup>     | 4.0%             |
| <b>Interest in receiving information through WhatsApp (Yes/No)</b>                          |                 |                   |                       |                  |
| Interested                                                                                  | 26.9%           | 37.6%             | .073                  | 30.8%            |
| <b>Interest in asking physician about disease through WhatsApp (Yes/No)</b>                 |                 |                   |                       |                  |
| Interested                                                                                  | 35.1%           | 39.5%             | .546                  | 36.8%            |

Notes: All data are presented as percentages. Differences in values between the 2 gender groups are significant at .05 significance level. N/A, not applicable.

<sup>a</sup>. Fisher exact test performed.

Table S3 – Use, obtain information, interest in receiving information, and interest in asking a physician through ICT types by education level.

|                                                                                             | No education/<br>Primary<br>school<br>(n=136) | Secondar<br>y school<br>(n=95) | Undergraduate<br>/<br>Graduate<br>(n=64) | Chi-<br>square<br>p-value | Total<br>(n=295) |
|---------------------------------------------------------------------------------------------|-----------------------------------------------|--------------------------------|------------------------------------------|---------------------------|------------------|
| Internet Access                                                                             | 19.4%                                         | 47.1%                          | 64.5%                                    | .000                      | 38.1%            |
| <b>Owning</b>                                                                               |                                               |                                |                                          |                           |                  |
| Cellphone                                                                                   | 69.5%                                         | 82.8%                          | 87.1%                                    | .009                      | 77.5%            |
| Smartphone                                                                                  | 23.5%                                         | 30.9%                          | 46.4%                                    | .013                      | 31.5%            |
| <b>Use of ICT type (at least once a week)</b>                                               |                                               |                                |                                          |                           |                  |
| SMS                                                                                         | 34.2%                                         | 47.1%                          | 71.2%                                    | .000                      | 47.1%            |
| Facebook                                                                                    | 15.6%                                         | 36.0%                          | 35.1%                                    | .003                      | 27.6%            |
| Twitter                                                                                     | 1.1%                                          | 9.2%                           | 6.3%                                     | .041 <sup>a</sup>         | 5.2%             |
| YouTube                                                                                     | 3.2%                                          | 9.4%                           | 20.4%                                    | .003                      | 9.5%             |
| Email                                                                                       | 10.1%                                         | 27.3%                          | 64.4%                                    | .000                      | 29.3%            |
| Internet                                                                                    | 12.4%                                         | 37.2%                          | 70.7%                                    | .000                      | 35.3%            |
| LinkedIn                                                                                    | 0.0%                                          | 2.7%                           | 2.2%                                     | .326 <sup>a</sup>         | 1.4%             |
| Skype                                                                                       | 0.0%                                          | 5.4%                           | 8.5%                                     | .015 <sup>a</sup>         | 3.8%             |
| <b>Uses ICT to obtain information about disease</b>                                         |                                               |                                |                                          |                           |                  |
| Internet                                                                                    | 14.2%                                         | 26.1%                          | 44.3%                                    | .000                      | 25.5%            |
| Facebook                                                                                    | 5.9%                                          | 5.9%                           | 5.5%                                     | 1.000 <sup>a</sup>        | 5.8%             |
| Twitter                                                                                     | 1.0%                                          | 0.0%                           | 3.6%                                     | .179 <sup>a</sup>         | 1.3%             |
| YouTube                                                                                     | 2.0%                                          | 1.2%                           | 7.4%                                     | .118 <sup>a</sup>         | 3.0%             |
| Email                                                                                       | 3.0%                                          | 3.7%                           | 19.0%                                    | .000                      | 7.1%             |
| <b>Interest in receiving information through electronic media type (high/some interest)</b> |                                               |                                |                                          |                           |                  |
| SMS                                                                                         | 36.7%                                         | 45.3%                          | 58.6%                                    | .025                      | 44.7%            |
| Facebook                                                                                    | 15.6%                                         | 21.7%                          | 22.6%                                    | .470                      | 19.4%            |
| Twitter                                                                                     | 0.0%                                          | 3.7%                           | 3.8%                                     | .107 <sup>a</sup>         | 2.2%             |
| LinkedIn                                                                                    | 0.0%                                          | 0.0%                           | 0.0%                                     | N/A                       | 0.0%             |
| Email                                                                                       | 12.1%                                         | 26.7%                          | 61.4%                                    | .000                      | 28.9%            |
| <b>Interest in asking physician through ICT type (high/some interest)</b>                   |                                               |                                |                                          |                           |                  |
| SMS                                                                                         | 83.1%                                         | 86.3%                          | 90.6%                                    | .357                      | 85.8%            |
| Facebook                                                                                    | 26.4%                                         | 41.2%                          | 47.4%                                    | .014                      | 36.1%            |
| Twitter                                                                                     | 10.1%                                         | 12.2%                          | 9.4%                                     | .853                      | 10.7%            |
| LinkedIn                                                                                    | 2.1%                                          | 2.5%                           | 0.0%                                     | .683 <sup>a</sup>         | 1.7%             |
| Email                                                                                       | 1.1%                                          | 3.8%                           | 9.8%                                     | .040 <sup>a</sup>         | 4.0%             |
| <b>Interest in receiving information through WhatsApp (Yes/No)</b>                          |                                               |                                |                                          |                           |                  |
| Interested                                                                                  | 20.4%                                         | 29.1%                          | 51.6%                                    | .000                      | 30.7%            |
| <b>Interest in asking physician about disease through WhatsApp (Yes/No)</b>                 |                                               |                                |                                          |                           |                  |
| Interested                                                                                  | 28.3%                                         | 34.6%                          | 54.5%                                    | .005                      | 36.6%            |

Notes: All data are presented as percentages. Differences in values between the 3 education level groups are significant at .05 significance level. N/A, not applicable.

<sup>a</sup>. Fisher exact test performed.

Table S4 – Use, obtain information, interest in receiving information, and interest in asking a physician through ICT types by years since diagnosis.

|                                                                                             | ≤ 5 years with COPD<br>(n=174) | > 5 years with<br>COPD<br>(n=119) | Chi-square<br>p-value | Total<br>(n=295) |
|---------------------------------------------------------------------------------------------|--------------------------------|-----------------------------------|-----------------------|------------------|
| Internet Access                                                                             | 39.4%                          | 36.9%                             | .681                  | 38.4%            |
| <b>Owning</b>                                                                               |                                |                                   |                       |                  |
| Cellphone                                                                                   | 79.0%                          | 75.7%                             | .509                  | 77.7%            |
| Smartphone                                                                                  | 32.4%                          | 30.2%                             | .727                  | 31.6%            |
| <b>Use of ICT type (at least once a week)</b>                                               |                                |                                   |                       |                  |
| SMS                                                                                         | 46.8%                          | 47.4%                             | .927                  | 47.1%            |
| Facebook                                                                                    | 26.4%                          | 29.2%                             | .632                  | 27.4%            |
| Twitter                                                                                     | 5.3%                           | 5.1%                              | 1.000 <sup>a</sup>    | 5.2%             |
| YouTube                                                                                     | 7.5%                           | 13.1%                             | .162                  | 9.5%             |
| Email                                                                                       | 24.0%                          | 37.2%                             | .027                  | 29.1%            |
| Internet                                                                                    | 36.2%                          | 34.1%                             | .732                  | 35.4%            |
| LinkedIn                                                                                    | 1.5%                           | 1.3%                              | 1.000 <sup>a</sup>    | 1.4%             |
| Skype                                                                                       | 3.8%                           | 3.9%                              | 1.000 <sup>a</sup>    | 3.8%             |
| <b>Uses ICT to obtain information about disease</b>                                         |                                |                                   |                       |                  |
| Internet                                                                                    | 24.2%                          | 27.1%                             | .609                  | 25.3%            |
| Facebook                                                                                    | 4.6%                           | 6.8%                              | .558 <sup>a</sup>     | 5.4%             |
| Twitter                                                                                     | 0.7%                           | 1.2%                              | 1.000 <sup>a</sup>    | 0.9%             |
| YouTube                                                                                     | 2.0%                           | 4.7%                              | .263 <sup>a</sup>     | 3.0%             |
| Email                                                                                       | 4.6%                           | 10.3%                             | .090                  | 6.7%             |
| <b>Interest in receiving information through electronic media type (high/some interest)</b> |                                |                                   |                       |                  |
| SMS                                                                                         | 42.7%                          | 47.9%                             | .423                  | 44.6%            |
| Facebook                                                                                    | 20.4%                          | 16.9%                             | .512                  | 19.1%            |
| Twitter                                                                                     | 3.4%                           | 0.0%                              | .163 <sup>a</sup>     | 2.2%             |
| LinkedIn                                                                                    | 0.0%                           | 0.0%                              | N/A                   | 0.0%             |
| Email                                                                                       | 28.7%                          | 28.9%                             | .971                  | 28.8%            |
| <b>Interest in asking physician through ICT type (high/some interest)</b>                   |                                |                                   |                       |                  |
| SMS                                                                                         | 84.5%                          | 87.4%                             | .485                  | 85.7%            |
| Facebook                                                                                    | 34.0%                          | 39.4%                             | .390                  | 36.0%            |
| Twitter                                                                                     | 10.8%                          | 9.5%                              | .757                  | 10.3%            |
| LinkedIn                                                                                    | 2.7%                           | 0.0%                              | .300 <sup>a</sup>     | 1.8%             |
| Email                                                                                       | 4.2%                           | 3.7%                              | 1.000 <sup>a</sup>    | 4.0%             |
| <b>Interest in receiving information through WhatsApp (Yes/No)</b>                          |                                |                                   |                       |                  |
| Interested                                                                                  | 32.1%                          | 29.0%                             | .602                  | 30.9%            |
| <b>Interest in asking physician about disease through WhatsApp (Yes/No)</b>                 |                                |                                   |                       |                  |
| Interested                                                                                  | 35.4%                          | 39.1%                             | .570                  | 36.8%            |

Notes: All data are presented as percentages. Differences in values between the 2 “years since diagnosis” groups are significant at .05 significance level. N/A, not applicable.

<sup>a</sup>. Fisher exact test performed.
